# Supplementary material for: Genomic architecture and inheritance of human ribosomal RNA gene clusters
Source: HighWire-hosted journal article supplement (doi:10.1101/gr.6858507), 2007-11-19
Supplement: Pierce-suppfig2.pdf [file Pierce-suppfig2.pdf]

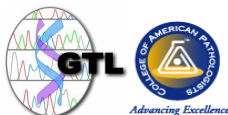

AABB Accredited  
Parentage Testing  
Facility

Genetic Testing Laboratory, Inc.  
New Mexico State University  
Las Cruces, New Mexico  
Toll Free: (866) 833-6895

## Results of DNA Analysis (Non-Legally Binding)

Photo ID's for the persons submitting these samples were not verified by witness.

<ORIGINAL REPORT IN COLOR>

Client Identification: Alicia J. Colliver      OID: M06-12151B      Report Release Date: 12/28/2006      NLB ANA INV3+      Page 1 of 1

| Sample Source:        | Mother (Other)     | Child (Focus)      | Father (Alleged)   | Exclusion Status* | Direct Index | Column Not Used |
|-----------------------|--------------------|--------------------|--------------------|-------------------|--------------|-----------------|
| Name:                 | PYFI-10-MA         | PYFI-02-TY         | PYFI-20-BR         |                   |              |                 |
| Racial Database Used: | Caucasian-American | Caucasian-American | Caucasian-American |                   |              |                 |
| Date Collected:       | Unknown            | Unknown            | Unknown            |                   |              |                 |
| STR Locus             | Allele Range       | Alleles Called     | Alleles Called     | Alleles Called    |              |                 |
| D3S1358               | (12 - 20)          | 14 15              | 15 16              | 15 16             | OK           | 2.072           |
| TH01                  | (4 - 13.3)         | 6 10               | 6 9.3              | 9.3               | OK           | 2.820           |
| D21S11                | (24 - 38)          | 32.2               | 29 32.2            | 29 32.2           | OK           | 1.933           |
| D18S51                | (8 - 27)           | 12 16              | 12 13              | 13 16             | OK           | 3.510           |
| Penta E               | (5 - 24)           | 7 12               | 5 12               | 5 12              | OK           | 7.478           |
| D5S818                | (7 - 16)           | 11 12              | 11 12              | 12                | OK           | 1.357           |
| D13S317               | (7 - 15)           | 11 12              | 12                 | 10 12             | OK           | 1.552           |
| D7S820                | (6 - 14)           | 10 13              | 12 13              | 11 12             | OK           | 4.719           |
| D16S539               | (5 - 15)           | 11 13              | 9 13               | 9 11              | OK           | 5.333           |
| CSF1PO                | (6 - 15)           | 10 11              | 10 12              | 11 12             | OK           | 1.667           |
| Penta D               | (2.2 - 17)         | 9 10               | 9                  | 9 13              | OK           | 2.915           |
| Amelogenin            | (XX - XY)          | Female (XX)        | Male (XY)          | Male (XY)         | N/A          | N/A             |
| vWA                   | (10 - 22)          | 15 19              | 17 19              | 17                | OK           | 3.800           |
| D8S1179               | (7 - 18)           | 12 15              | 12 14              | 14                | OK           | 5.375           |
| TPOX                  | (6 - 13)           | 8 11               | 8 11               | 8                 | OK           | 1.265           |
| FGA                   | (16 - 46.2)        | 20 23              | 20 21              | 21 23             | OK           | 2.730           |
| NOT USED              |                    |                    |                    |                   |              |                 |
| NOT USED              |                    |                    |                    |                   |              |                 |
| NOT USED              |                    |                    |                    |                   |              |                 |
| NOT USED              |                    |                    |                    |                   |              |                 |
| NOT USED              |                    |                    |                    |                   |              |                 |
| NOT USED              |                    |                    |                    |                   |              |                 |
| NOT USED              |                    |                    |                    |                   |              |                 |
| NOT USED              |                    |                    |                    |                   |              |                 |

Laboratory Batch Number: 63613130C1      Notable Events: Exclusions-None; Infrequent Events-None. See COMMENTS section for additional information.

**Statement of Results:** Alleged relationship is not excluded.

Based on the DNA analysis, the alleged Father, PYFI-20-BR, cannot be excluded as the biological Father of the Child, PYFI-02-TY, because they share genetic markers. Of the genetic identity systems tested, 15 of 15 match. (99.999945964304% of the Caucasian-American male population is excluded from the possibility of being the biological Father). The probability of the stated relationship is indicated below, as compared with an untested, unrelated Caucasian-American male. Analyses, with the exception of sample collection, were conducted in accordance with the Standards for PCR DNA analysis set forth by the AABB.

**Statistical Results:**

Combined Direct Index      5,383,421      .....Probability =      99.999981424455%

Prior Probability      0.50      .....Statistical Constant

**Comments:**

For legal and/or custody cases documentation of Informed Consent Notification and Sample Chain of Custody are included with this report. DNA amplified with PowerPlex® 16 System, detected using the ABI PRISM® 3130xl Genetic Analyzer and analyzed with GeneMapper® ID Software. \*Exclusion Status: OK = (Alleged) allele(s) consistent with (Focus) allele(s).

Go to > <http://www.gtlDNA.com/interpretation.html> < for assistance with the interpretation of this report.

Thank you for using our services! If you ordered a hardcopy, it will be forwarded in approximately 7 business days.
